# Supplementary material for: Cellular uptake, imaging and pathotoxicological studies of a novel Gd[iii]–DO3A-butrol nano-formulation
Source: Royal Society of Chemistry journal article supplement (doi:10.1039/c4ra05596a), 2014-01-01

## Cellular uptake, imaging and pathotoxicological studies of Novel Gd [III]-DO3A-butrol Nano-Formulation

*Elham Mohammadi,<sup>1</sup> Massoud Amanlou <sup>2</sup>, Seyed Esmaeil Sadat Ebrahimi<sup>2</sup>, Morteza Pirali Hamedani<sup>2</sup>, Abdolkarim Mahrooz <sup>3</sup>, Bita Mehravi<sup>4</sup>, Baharak Abd Emami<sup>5</sup>, Mohammad Reza Aghasadeghi<sup>6</sup>, Ahmad Bitarafan-Rajabi<sup>7</sup>, Hamid Reza Pour Ali Akbar<sup>8</sup>, Mehdi Shafiee Ardestani<sup>9\*</sup>,*

*1-Department of biochemistry, Faculty of Biochemistry, Mazandaran University of Medical Sciences, Mazandaran, Iran*

*2- Department of Medicinal Chemistry, Faculty of Pharmacy, Tehran University of Medical Sciences, Tehran, Iran*

*3- Molecular and Cell Biology Research Center, Mazandaran University of Medical Sciences, Sari, Iran*

*4- Faculty of Advanced Technologies in Medicine, Iran University of Medical Sciences, Tehran, Iran*

*5-National Cell Bank, Pasteur institute of Iran, Tehran, Iran*

*6-Department of Hepatitis and AIDS, Pasteur Institute of Iran, Tehran, Iran*

*7-Cardiovascular interventional research Centre; Department of Nuclear Medicine, Rajaei Cardiovascular, Medical & Research Center; Iran University of Medical Sciences, Tehran, Iran*

*8-Cardiovascular, Medical & Research Center; Radiology Department; Iran University of Medical Sciences, Tehran, Iran*

*9- Department of Radiopharmacy, Faculty of Pharmacy, Tehran University of Medical Sciences, Tehran, Iran*

**Running title (Novelty):** Cellular uptake and imaging studies of Novel Gadobutrol-ALGD-G2

*\*Address correspondence to this author at the Department of Radiopharmacy, Faculty of Pharmacy, Tehran University of Medical Sciences, Tehran, Iran, Tel/Fax: +98-021-66953311*

E-mail: [shafieeardestani@gmail.com](mailto:shafieeardestani@gmail.com), [shafieeardestani@sina.tums.ac.ir](mailto:shafieeardestani@sina.tums.ac.ir)

## Supplementary Materials:

### Cellular Toxicity Assay (MTT)

Based on the previously published literature<sup>14-17</sup> both tumor (MCF-7) and normal (HEK-293) cells lines, provided from National Cell Bank of Pasteur Institute of Iran, were cultured and exposed to the same concentration (5 $\mu$ g/ml) of the different nano-formulated contrast agent and gadobutrol for a period of 24 hrs and OD was obtained from ELISA reader at 570 nm respectively. The MCF-7 cellular exposures showed a mild significant  $p < 0.05$  cellular toxicity for Nano-formulation 2X as well as a not significant cellular toxicity  $p > 0.05$  for those of Nano-formulation X and gadobutrol. Furthermore, not any HEK-293 cellular toxicity was observed from the nano-formulations and gadobutrol exposures. (See original data at S-1<sub>a-b</sub>) Briefly, gadobutrol was shown to be safe and insert both normal and cancer cell line but the gadobutrol nanoformulation was found safe on normal human kidney cell line (as a major toxicity target of gadolinium based contrast agent) and toxic on cancer cell lines.

**S-1<sub>a</sub>:** Results of the same concentration (5 $\mu$ g/ml) of the different nano-formulated contrast agent and gadobutrol for a period of 24 hrs on MCF-7 cell lines.

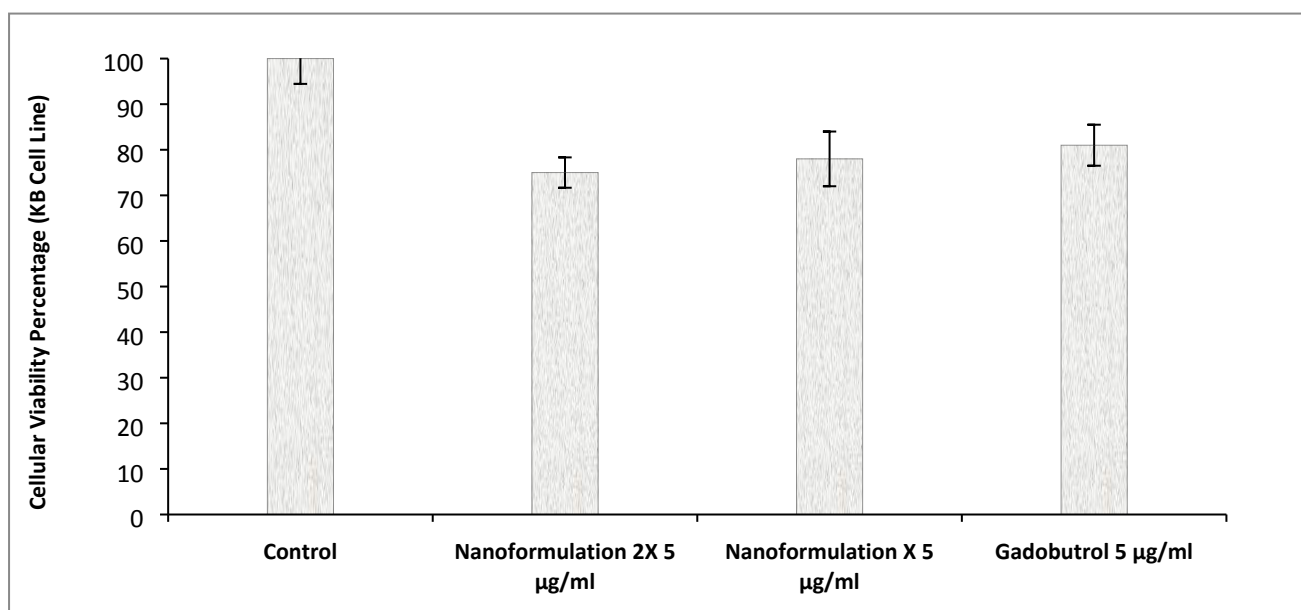

**S-1<sub>b</sub>:** Results of the same concentration (5µg/ml) of the different nano-formulated contrast agent and gadobutrol for a period of 24 hrs on MCF-7 cell lines. **S-1<sub>a</sub>:** Results of the same concentration (5µg/ml) of the different nano-formulated contrast agent and gadobutrol for a period of 24 hrs on HEK-293 cell lines.

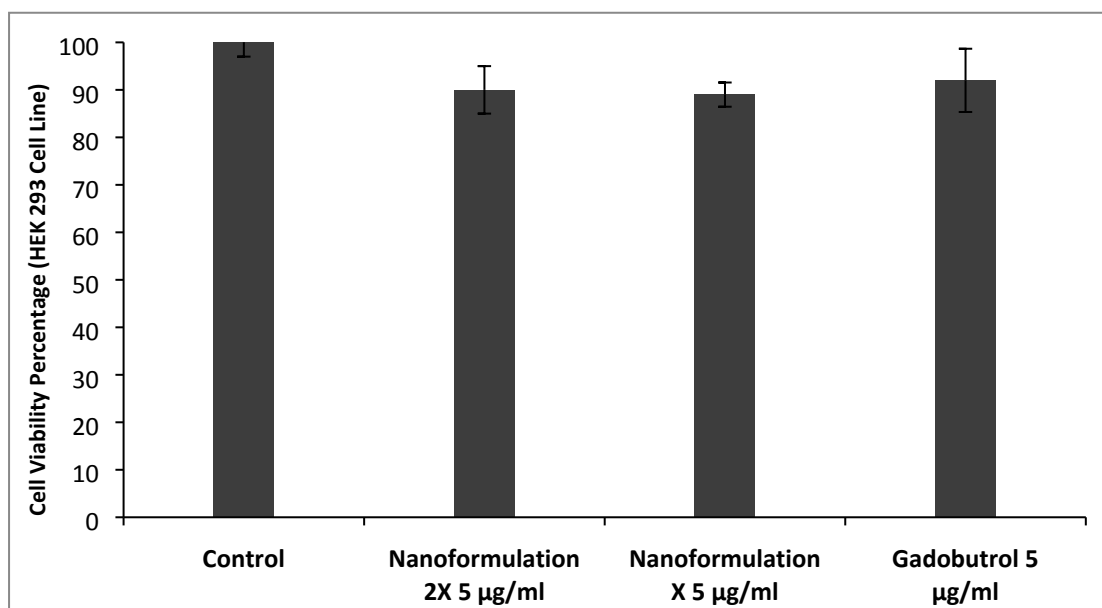

## AFM Imaging

For morphology investigations of the proposed nano-formulations X and 2X Atomic Force Microscopy were employed and two and three dimensional images were obtained as demonstrated in S-2<sub>a</sub> and S-2<sub>b</sub>.

### S-2<sub>a</sub>: 2D and 3D AFM images of nanoformulation X.

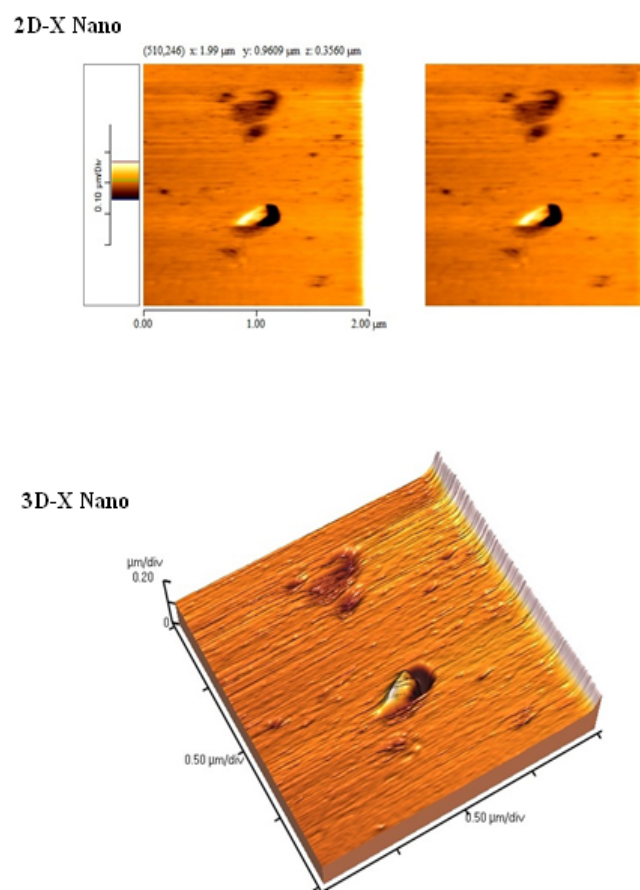

**S-2<sub>b</sub>: 2D and 3D AFM images of nanoformulation 2X.**

**2D-2X Nano**

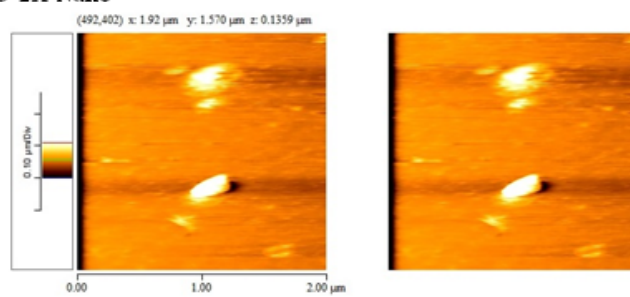

**3D-2X Nano**

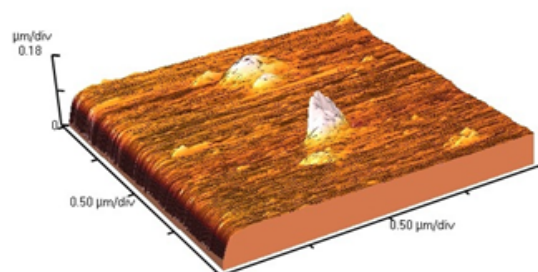

## SEM Imaging

For more morphology investigations of the proposed nano-formulations X and 2X sizes, Single Electron Microscopy were used and images were obtained as demonstrated in S-3<sub>a</sub> and S-3<sub>b</sub>. Before preparation of imaging samples the formulations were rigorously sonicated to avoid any unwanted nanoparticle's aggregations. According to the results sizes obtained at a lower ranged (<200 nm) than observed by AFM or Zetasizer's data.

**S-3<sub>a</sub>: SEM image of X nano-formulation**

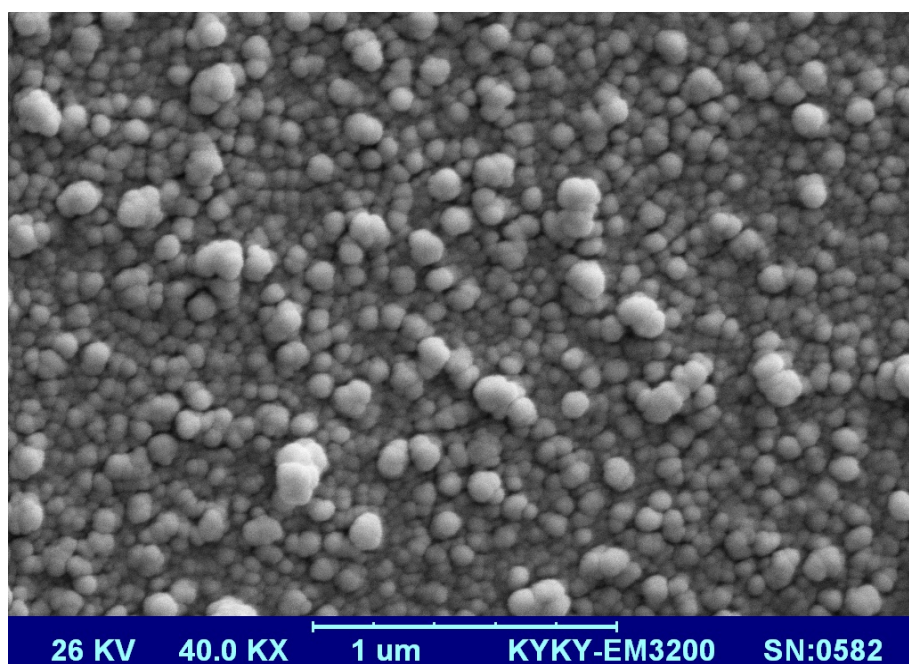

**S-3<sub>b</sub>: SEM image of 2X nano-formulation**

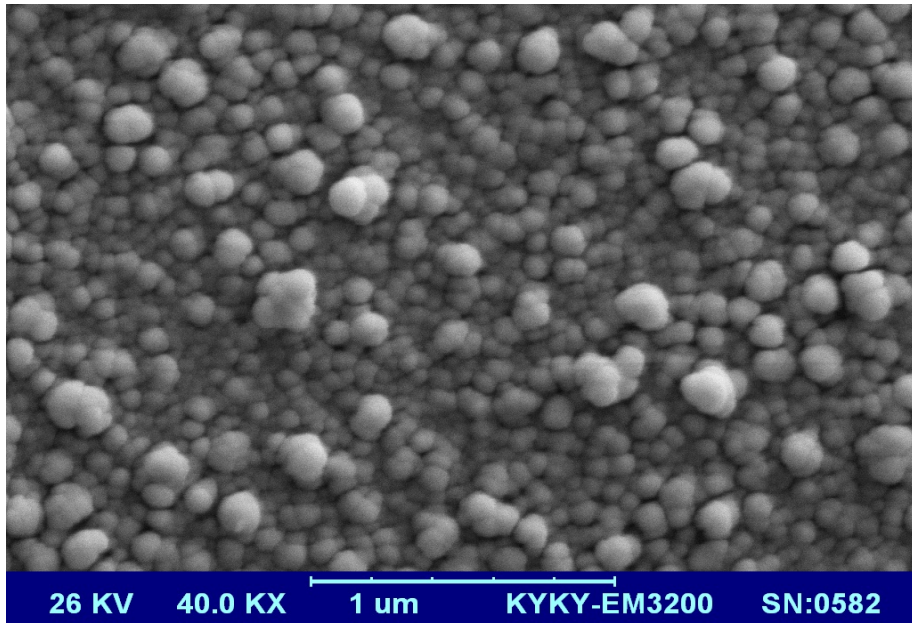

Supplement: c4ra05596a1.pdf [file c4ra05596a1.pdf]
